# Supplementary material
Source: Springer Nature journal article supplement (https://www.springermedizin.de/resource/supplementary/12889_2010_2653_MOESM1_ESM.pdf/9486894)
Supplement: MOESM1 [file 9486894]

**Enrollment**

Assessed eligibility (20 GPs)

**Allocation**

Randomization (20 GPs)

**Intervention group**

Allocated to intervention group (10 GPs)  
Assessment of nutritional intake using FFQW82  
· Face-to-face counseling session with registered dietitian for strategies of glycemic control and deciding on 1 or 2 short-term goals for subsequent 1 month and study duration for glycemic control based on the result of FFQW82

**Control group**

Allocated to control group (10 GPs)  
Assessment of nutrition intake using FFQW82  
· Receiving result of FFQW82 and brief advice by registered dietitian

**at 1 month**

**Follow up**  
· Face-to face counseling session or receiving telephone counseling by registered dietitian.

**at 2-6 months**

**Follow up**  
· Face-to-face counseling session or receiving telephone counseling by registered dietitian within 2 months after last session.

**at 6 months**

Physical examinations (HbA1c, etc.)  
Assessment of nutritional intake using FFQW82

**at 6 months**

Physical examinations (HbA1c, etc.)  
Assessment of nutritional intake using FFQW82
